# Supplementary material
Source: MDPI journal article supplement (https://www.mdpi.com/2073-445X/12/11/2073)
Supplement: s1 [file s1]

**Table S1.** Land use and land cover changes in Xinjiang (in km<sup>2</sup>).

| 1990<br>2000 | Farmland | Forest   | Grassland | Water    | Built-up | Unused     | Total      |
|--------------|----------|----------|-----------|----------|----------|------------|------------|
| Farmland     | 47692.69 | 718.58   | 7914.53   | 96.03    | 818.35   | 2102.21    | 59342.40   |
| Forest       | 702.38   | 30214.18 | 6021.16   | 137.20   | 36.53    | 1045.28    | 38156.72   |
| Grassland    | 5565.64  | 4118.95  | 446961.17 | 1054.83  | 139.58   | 21782.55   | 479622.73  |
| Water        | 289.27   | 242.88   | 2262.40   | 45771.67 | 17.02    | 3871.17    | 52454.40   |
| Built-up     | 972.75   | 47.18    | 244.16    | 7.55     | 2973.59  | 126.24     | 4371.47    |
| Unused       | 1547.22  | 566.00   | 21563.05  | 2547.33  | 129.99   | 979809.82  | 1006163.41 |
| Total        | 56769.96 | 35907.76 | 484966.47 | 49614.62 | 4115.06  | 1008737.27 |            |
| R            | 0.91%    | 1.25%    | -0.22%    | 1.14%    | 1.25%    | -0.05%     |            |
| 2000<br>2010 | Farmland | Forest   | Grassland | Water    | Built-up | Unused     | Total      |
| Farmland     | 58716.40 | 565.76   | 5104.01   | 48.06    | 4.24     | 2098.53    | 66537.00   |
| Forest       | 4.84     | 37501.64 | 69.41     | 10.27    | 0.90     | 167.47     | 37754.53   |
| Grassland    | 303.38   | 48.53    | 473803.94 | 253.45   | 2.37     | 370.37     | 474782.05  |
| Water        | 33.77    | 28.28    | 213.81    | 51860.74 | 2.16     | 509.62     | 52648.37   |
| Built-up     | 107.80   | 6.49     | 62.89     | 13.76    | 4358.62  | 248.82     | 4798.38    |
| Unused       | 176.23   | 6.04     | 368.82    | 268.19   | 3.17     | 1002768.81 | 1003591.26 |
| Total        | 59342.41 | 38156.75 | 479622.88 | 52454.47 | 4371.47  | 1006163.61 |            |
| R            | 2.42%    | -0.21%   | -0.20%    | 0.07%    | 1.95%    | -0.05%     |            |
| 2010<br>2020 | Farmland | Forest   | Grassland | Water    | Built-up | Unused     | Total      |
| Farmland     | 65665.07 | 218.29   | 1812.18   | 63.23    | 80.49    | 1190.11    | 69029.38   |
| Forest       | 61.76    | 36674.58 | 622.07    | 26.06    | 4.17     | 115.95     | 37504.59   |
| Grassland    | 516.08   | 731.85   | 471174.22 | 405.25   | 12.08    | 1035.73    | 473875.20  |
| Water        | 43.84    | 36.81    | 186.71    | 51824.65 | 8.27     | 279.57     | 52379.86   |
| Built-up     | 121.13   | 5.65     | 38.06     | 1.85     | 4685.99  | 135.37     | 4988.05    |
| Unused       | 129.13   | 87.33    | 948.69    | 327.26   | 7.38     | 1000834.31 | 1002334.09 |
| Total        | 66537.00 | 37754.50 | 474781.94 | 52648.30 | 4798.38  | 1003591.04 |            |
| R            | 0.75%    | -0.13%   | -0.04%    | -0.10%   | 0.79%    | -0.03%     |            |

**Table S2.** Land use and land cover changes in the Tarim River region (in km<sup>2</sup>).

| 1990<br>2000 | Farmland | Forest  | Grassland | Water  | Built-up | Unused   | Total    |
|--------------|----------|---------|-----------|--------|----------|----------|----------|
| Farmland     | 1727.51  | 31.45   | 575.62    | 4.40   | 20.48    | 115.62   | 2475.09  |
| Forest       | 36.84    | 2787.91 | 1846.96   | 34.41  | 1.79     | 371.04   | 5078.93  |
| Grassland    | 119.97   | 277.22  | 16930.20  | 45.79  | 6.93     | 645.88   | 18026.00 |
| Water        | 9.90     | 49.57   | 227.50    | 679.22 | 0.18     | 29.26    | 995.62   |
| Built-up     | 14.98    | 0.22    | 4.92      | 0.03   | 51.16    | 0.33     | 71.65    |
| Unused       | 23.84    | 76.87   | 2107.67   | 57.80  | 0.88     | 12028.89 | 14295.95 |
| Total        | 1933.05  | 3223.23 | 21692.87  | 821.65 | 81.42    | 13191.02 |          |
| R            | 5.61%    | 11.51%  | -3.38%    | 4.23%  | -2.40%   | 1.68%    |          |
| 2000<br>2010 | Farmland | Forest  | Grassland | Water  | Built-up | Unused   | Total    |
| Farmland     | 2463.50  | 303.31  | 598.03    | 16.20  | 0.17     | 117.89   | 3499.09  |
| Forest       | 0.00     | 4753.06 | 6.74      | 0.21   | 0.00     | 38.75    | 4798.75  |
| Grassland    | 3.74     | 15.83   | 17393.63  | 78.99  | 0.00     | 48.59    | 17540.78 |
| Water        | 0.04     | 3.99    | 25.44     | 898.02 | 0.00     | 53.14    | 980.63   |
| Built-up     | 7.81     | 0.00    | 1.06      | 0.00   | 71.48    | 0.01     | 80.36    |
| Unused       | 0.00     | 2.75    | 1.11      | 2.20   | 0.00     | 14037.57 | 14043.62 |
| Total        | 2475.09  | 5078.93 | 18026.00  | 995.62 | 71.65    | 14295.95 |          |
| R            | 8.27%    | -1.10%  | -0.54%    | -0.30% | 2.43%    | -0.35%   |          |
| 2010<br>2020 | Farmland | Forest  | Grassland | Water  | Built-up | Unused   | Total    |
| Farmland     | 3414.19  | 119.57  | 153.95    | 17.62  | 2.72     | 36.44    | 3744.49  |
| Forest       | 17.02    | 4580.52 | 44.86     | 6.74   | 0.35     | 26.63    | 4676.11  |
| Grassland    | 55.67    | 71.06   | 17236.20  | 100.08 | 0.22     | 80.16    | 17543.38 |
| Water        | 2.62     | 8.53    | 7.25      | 832.53 | 0.05     | 4.74     | 855.71   |
| Built-up     | 3.97     | 0.13    | 0.60      | 0.03   | 77.00    | 0.04     | 81.76    |
| Unused       | 5.63     | 18.94   | 97.94     | 23.64  | 0.03     | 13895.62 | 14041.79 |
| Total        | 3499.09  | 4798.75 | 17540.78  | 980.63 | 80.36    | 14043.62 |          |
| R            | 1.40%    | -0.51%  | 0.00%     | -2.55% | 0.35%    | 0.00%    |          |
